# Supplementary material for: Genomic Characterization of Mycoplasma arginini Isolated from a Housefly on a Dairy Farm and Comparison with Isolates from Bovine Milk and Lung Tissue
Source: PubMed Central journal article supplement (PMC10269790; doi:10.1128/spectrum.03010-22), 2023-05-18

# SUPPLEMENTARY MATERIAL

## Genomic characterization of *Mycoplasma arginini* isolated from a housefly in a dairy farm and comparison with isolates from bovine milk and lung tissue

G. Gioia,<sup>1a</sup> M. Severgnini,<sup>2a</sup> P. Cremonesi,<sup>3a</sup> B. Castiglioni,<sup>3</sup> J. Freeman,<sup>4</sup> A. Sipka,<sup>1</sup> C. Santisteban,<sup>1</sup> M. Wieland,<sup>1</sup> V. Alanis Gallardo,<sup>1,5</sup> J.G. Scott,<sup>4</sup> P. Moroni,<sup>1,6b</sup> M.F. Addis<sup>6</sup>

<sup>1</sup>Quality Milk Production Services, Animal Health Diagnostic Center, Cornell University, Ithaca, NY 14850, United States of America

<sup>2</sup> Institute of Biomedical Technologies, National Research Council, via f.lli Cervi, 93, 20054, Segrate, Milano, Italy

<sup>3</sup> Institute of Agricultural Biology and Biotechnology, National Research Council, via Einstein, 26900, Lodi, Italy.

<sup>4</sup> Department of Entomology, College of Agriculture and Life Sciences, Cornell University, Ithaca, NY, 14853

<sup>5</sup> Departamento de Medicina Preventiva y Salud Pública, Facultad de Medicina Veterinaria y Zootecnia, Universidad Nacional Autónoma de México, Ciudad Universitaria, CDMX 04510, México

<sup>6</sup> Università degli Studi di Milano, Dipartimento di Medicina Veterinaria e Scienze Animali, Via dell'Università, 6, 26900, Lodi, Italy

<sup>a</sup> These authors contributed equally

<sup>b</sup> Corresponding author: Paolo Moroni, [pm389@cornell.edu](mailto:pm389@cornell.edu)

|                                    |          |
|------------------------------------|----------|
| <b>SUPPLEMENTARY FIGURES .....</b> | <b>3</b> |
| SUPPLEMENTARY FIGURE 1 .....       | 3        |
| SUPPLEMENTARY FIGURE 2 .....       | 4        |
| SUPPLEMENTARY FIGURE 3 .....       | 5        |
| SUPPLEMENTARY FIGURE 4 .....       | 6        |
| SUPPLEMENTARY FIGURE 5 .....       | 7        |
| SUPPLEMENTARY FIGURE 6 .....       | 8        |
| SUPPLEMENTARY FIGURE 7 .....       | 9        |
| SUPPLEMENTARY FIGURE 8 .....       | 10       |
| SUPPLEMENTARY FIGURE 9 .....       | 11       |

## Supplementary Figures

### Supplementary Figure 1

Diagram depicting the pairwise percentage of identity (Blastn value) among the 27 16S rRNA sequences analyzed. Circle size is proportional to the identity, whereas the color graphically represents the identity: 100.0%, 95.0%-99.9%, 90.0%-94.9%, 85.0%-89.9%, ≤84.9%.

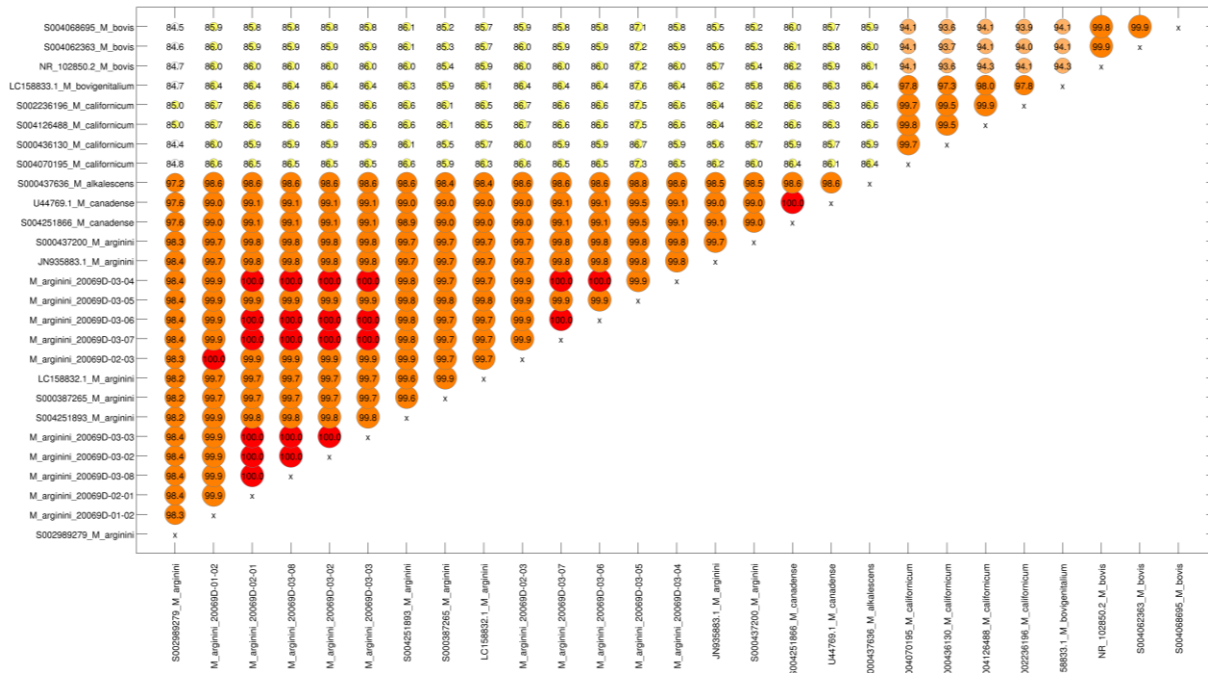

### Supplementary Figure 2

Heatmaps illustrating the percentage of identity (Blastn value) between the 10 newly sequenced *M. arginini* strains and the HAZ145 reference genome. In the figure, genes *arcA*, *argF*, *aspS*, *atpD*, *atpE*, *atpG*, *cmk*, *def*, *deoD*, *dnaB* are represented. A representative set of genes can be found in Figure 4 of the main text

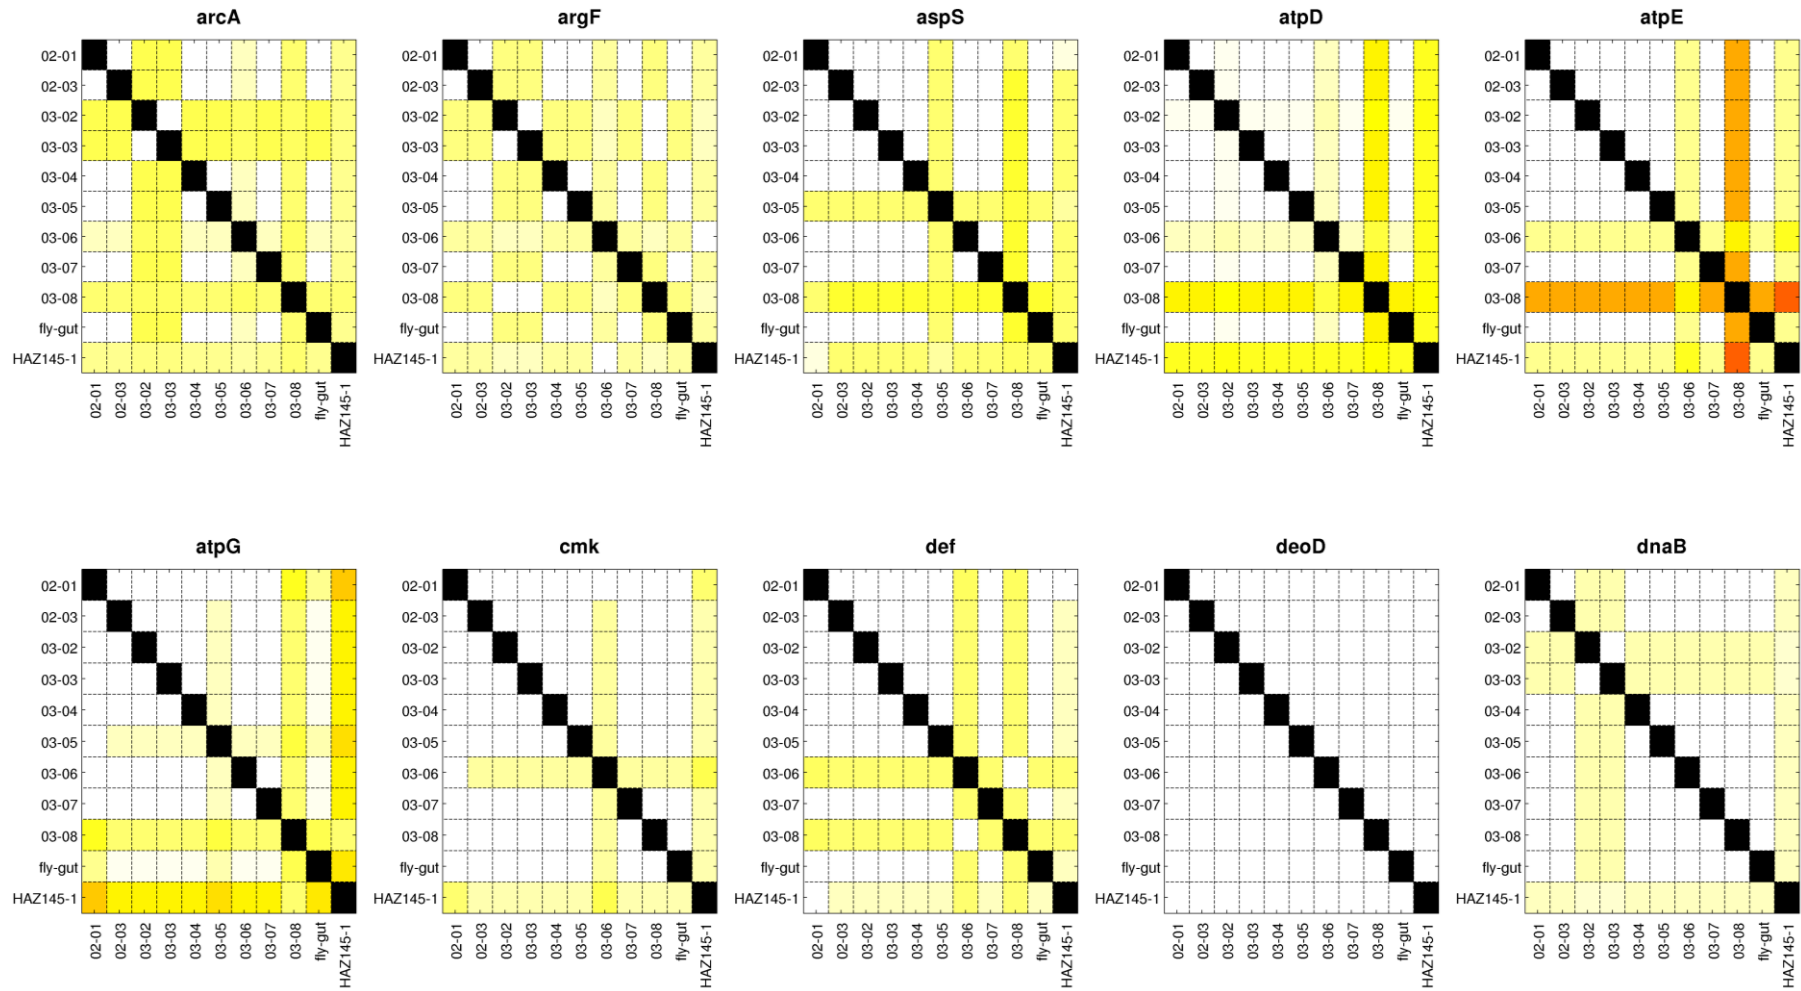

### Supplementary Figure 3

Heatmaps illustrating the percentage of identity (Blastn value) between the 10 newly sequenced *M. arginini* strains and the HAZ145 reference genome. In the figure, genes *dnaJ*, *dnaN*, *dnaX*, *era*, *ftsH*, *ftsY*, *gap*, *greA*, *gyrB*, *infA* are represented. A representative set of genes can be found in Figure 4 of the main text

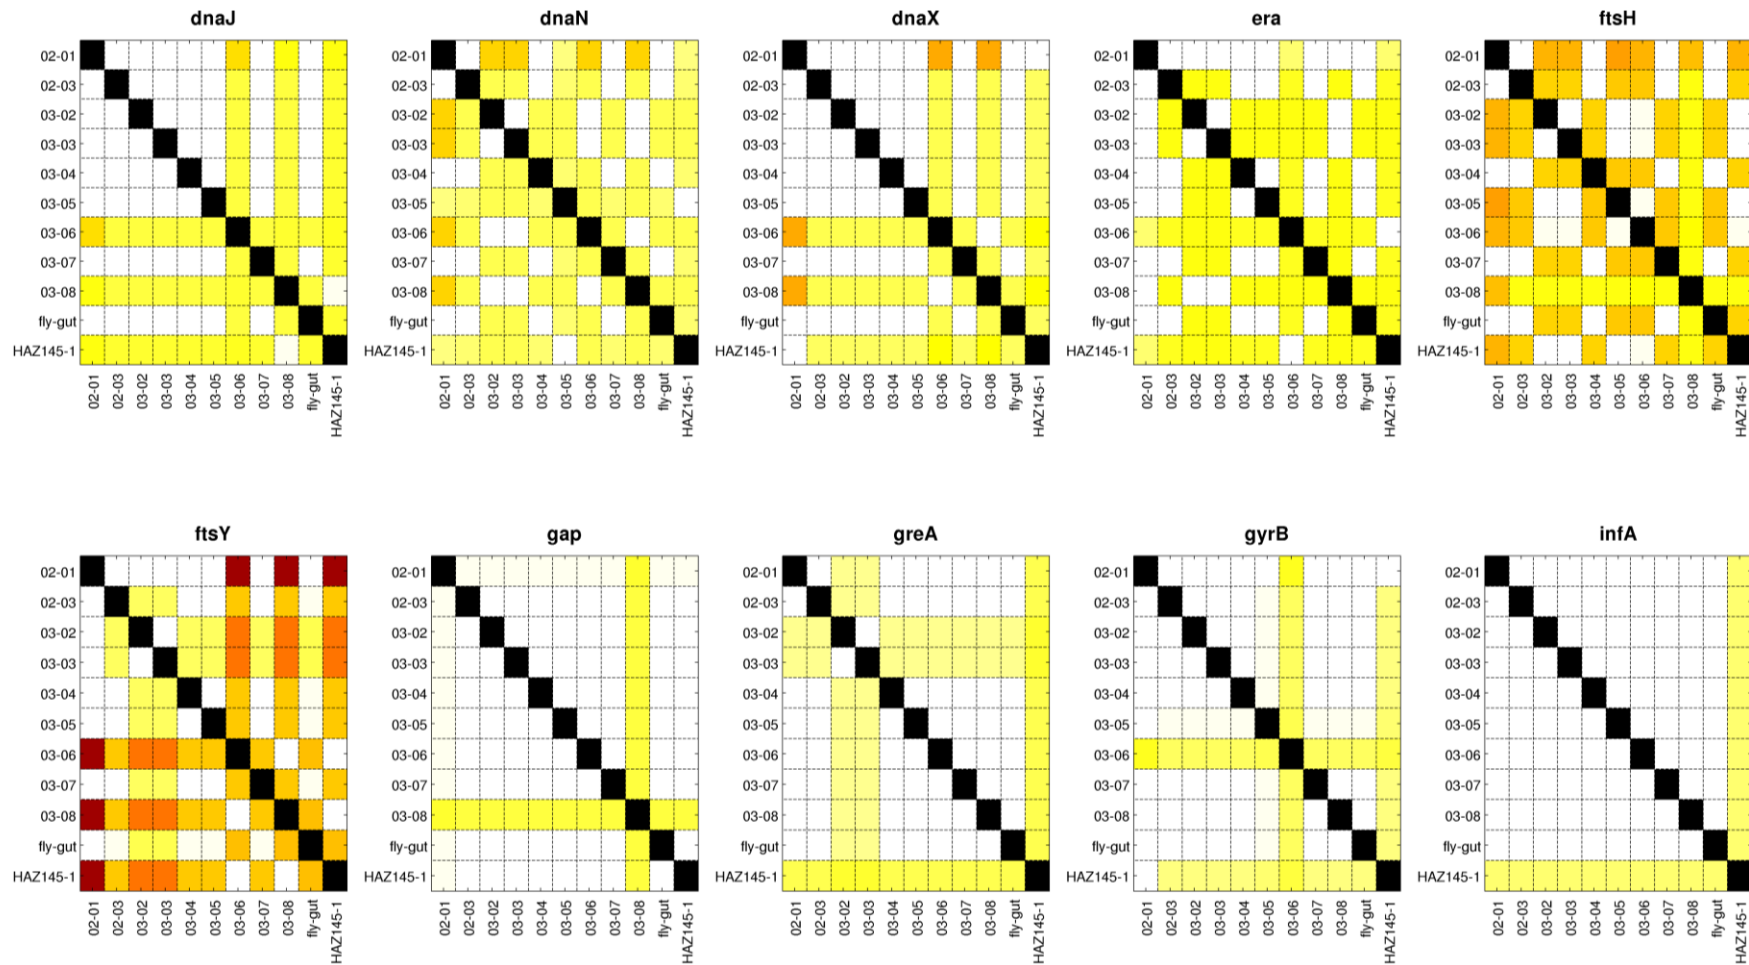

### Supplementary Figure 4

Heatmaps illustrating the percentage of identity (Blastn value) between the 10 newly sequenced *M. arginini* strains and the HAZ145 reference genome. In the figure, genes *lepA*, *lon*, *lysS*, *map*, *mnmA*, *mnmG*, *mutM*, *nadE*, *pepF*, *prfA* are represented. A representative set of genes can be found in Figure 4 of the main text

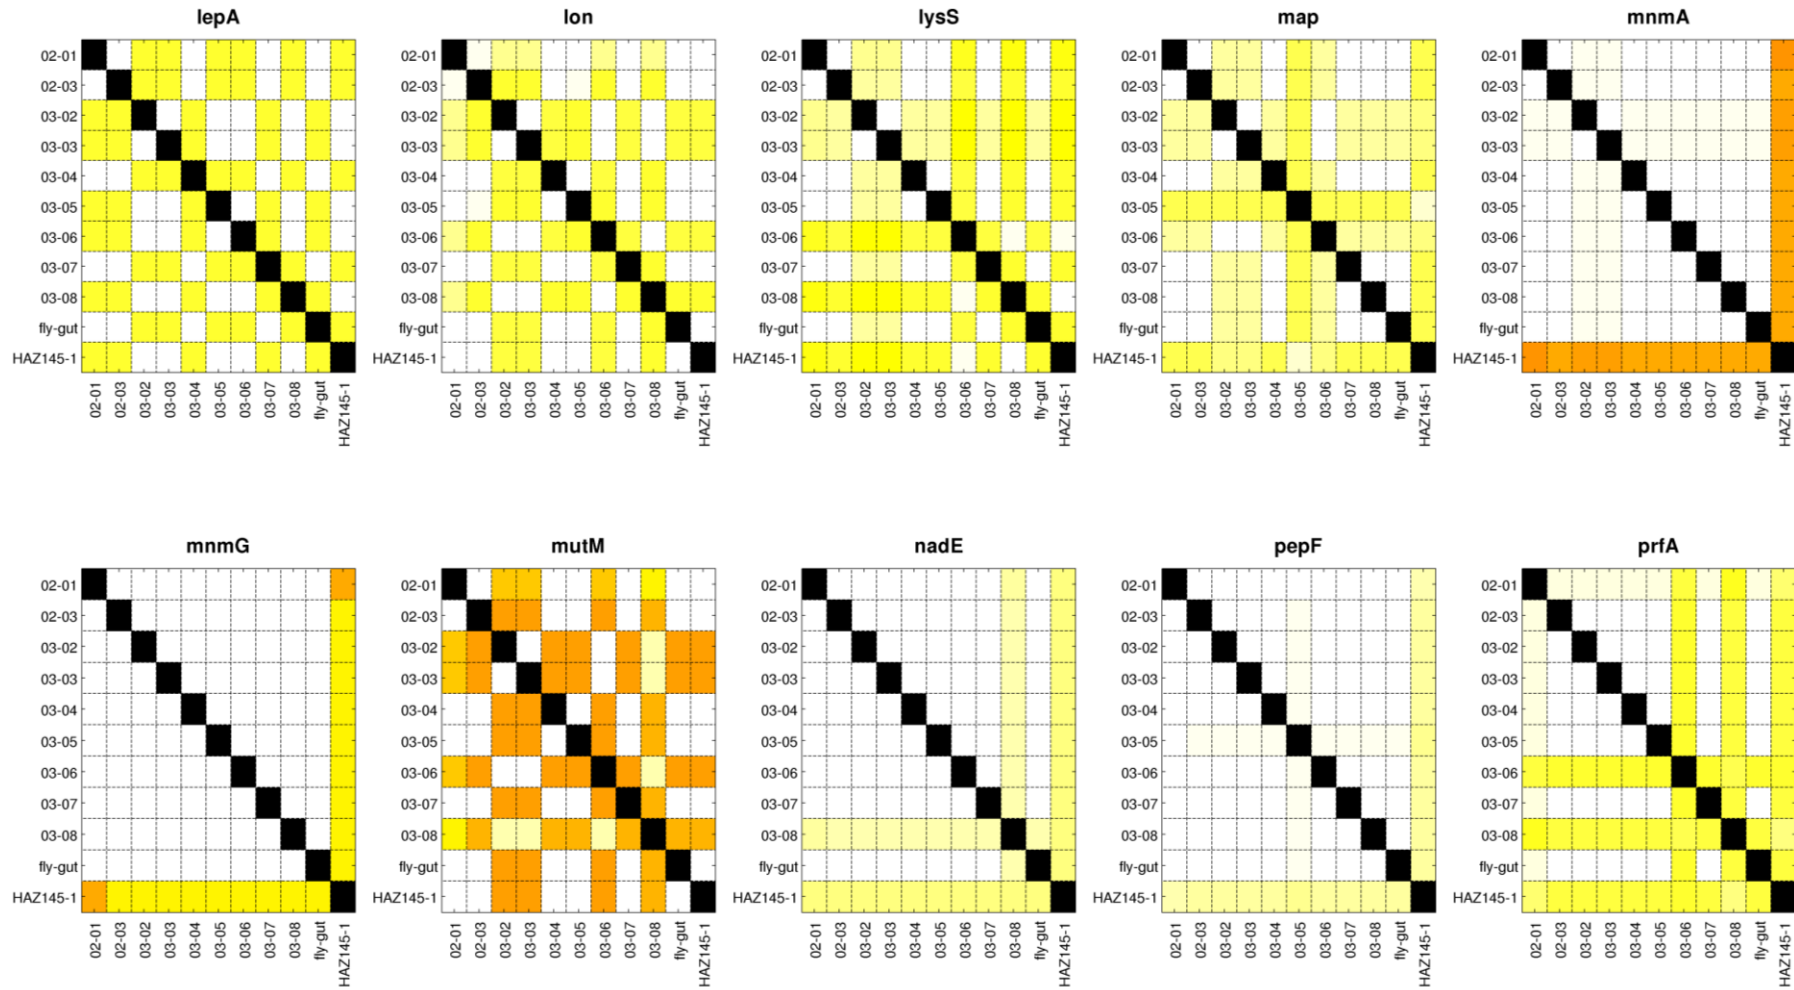

### Supplementary Figure 5

Heatmaps illustrating the percentage of identity (Blastn value) between the 10 newly sequenced *M. arginini* strains and the HAZ145 reference genome. In the figure, genes *pyk*, *recA*, *rnpA*, *rrn*, *rplB*, *rplC*, *rplD*, *rplE*, *rplF*, *rplK* are represented. A representative set of genes can be found in Figure 4 of the main text

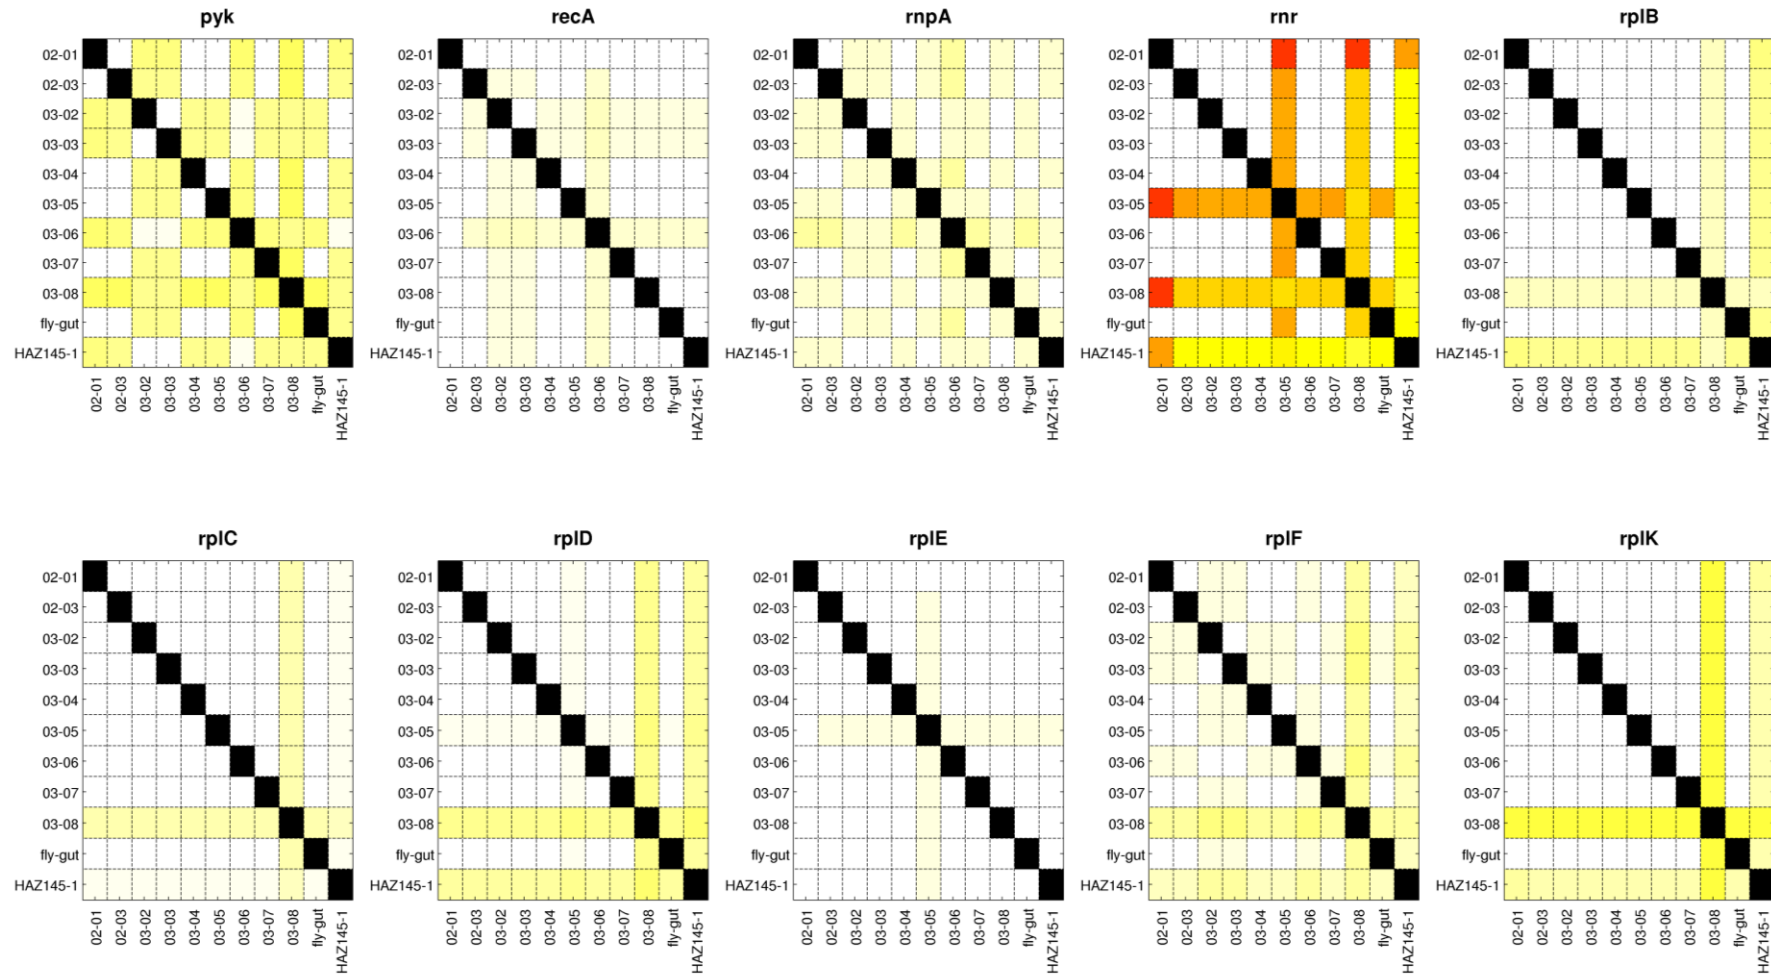

### Supplementary Figure 6

Heatmaps illustrating the percentage of identity (Blastn value) between the 10 newly sequenced *M. arginini* strains and the HAZ145 reference genome. In the figure, genes rplL, rplM, rplN, rplO, rplP, rplQ, rplS, rplT, rplU, rplV are represented. A representative set of genes can be found in Figure 4 of the main text

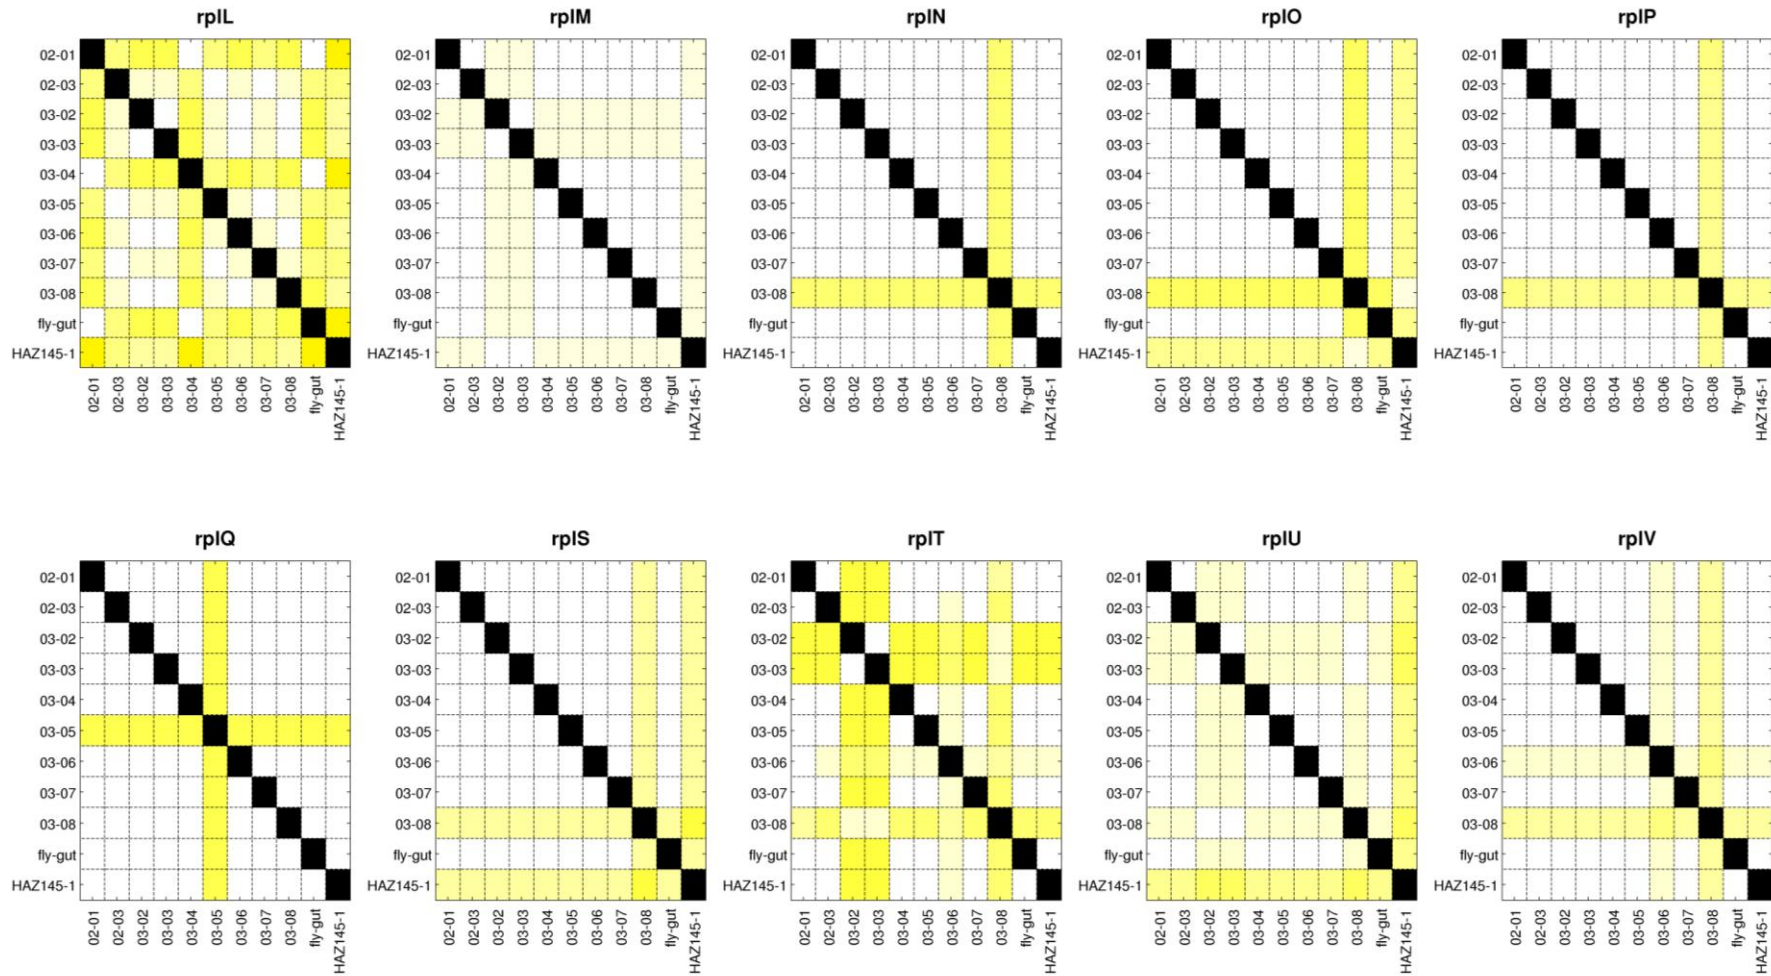



### Supplementary Figure 7

Heatmaps illustrating the percentage of identity (Blastn value) between the 10 newly sequenced *M. arginini* strains and the HAZ145 reference genome. In the figure, genes rpmA, rpmF, rpmJ, rpsB, rpsC, rpsD, rpsE, rpsG, rpsH, rpsI are represented. A representative set of genes can be found in Figure 4 of the main text

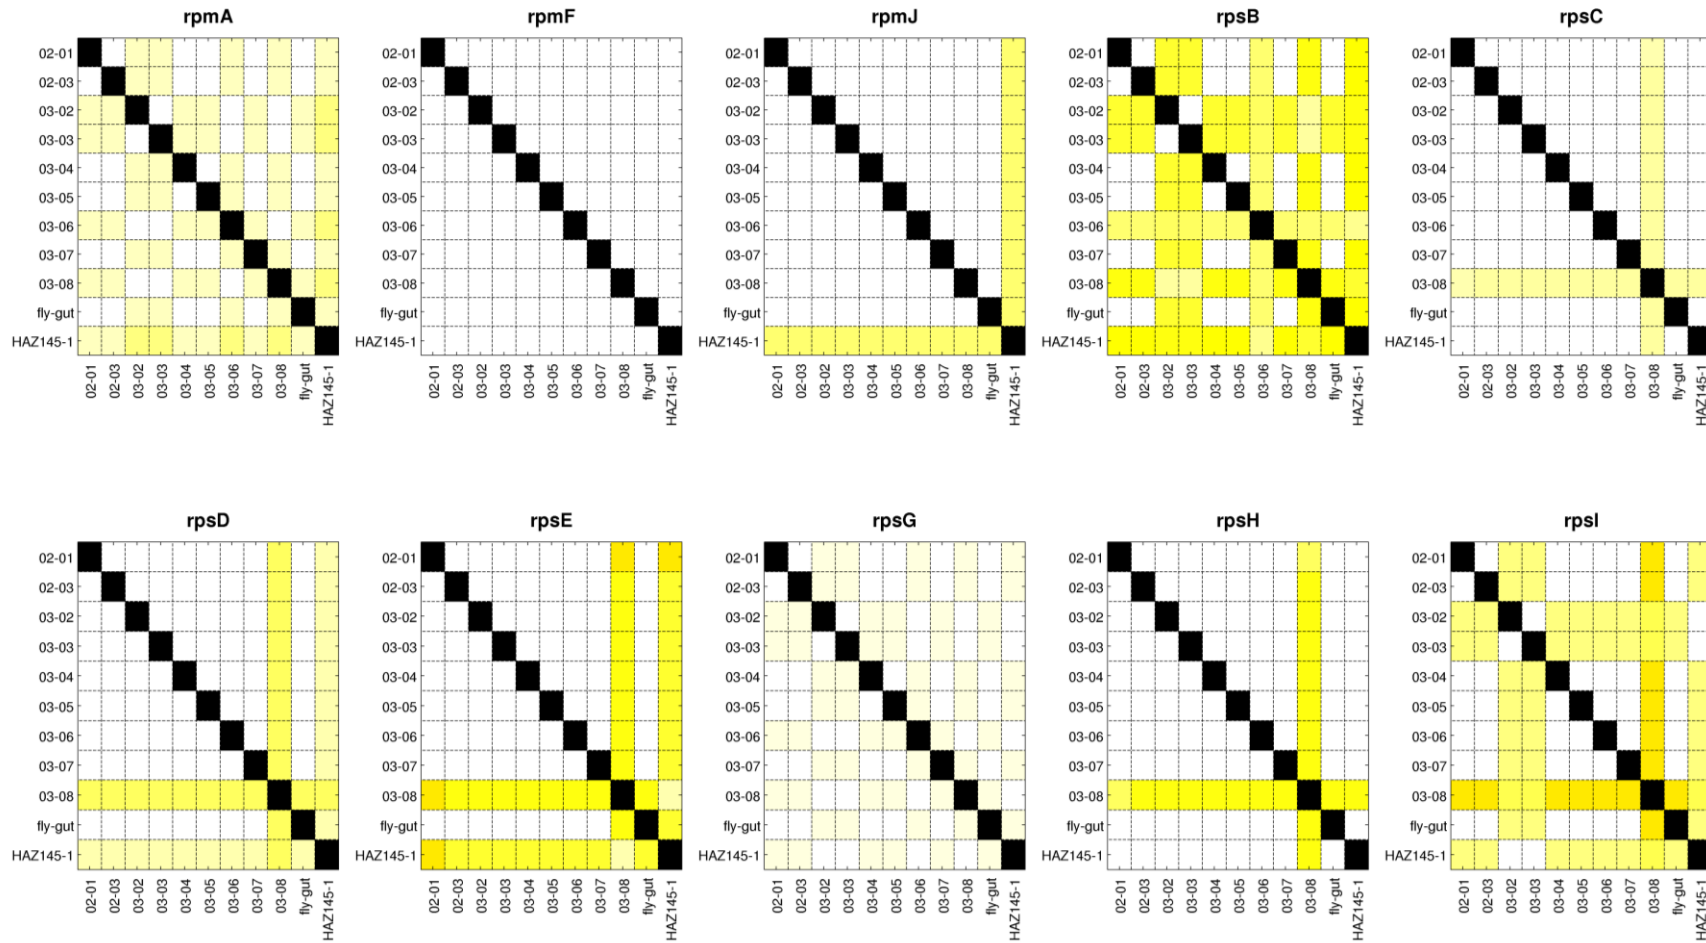

### Supplementary Figure 8

Heatmaps illustrating the percentage of identity (Blastn value) between the 10 newly sequenced *M. arginini* strains and the HAZ145 reference genome. In the figure, genes *rpsJ*, *rpsK*, *rpsL*, *rpsM*, *rpsQ*, *rsgA*, *rsmD*, *rsmI*, *secA*, *secY* are represented. A representative set of genes can be found in Figure 4 of the main text

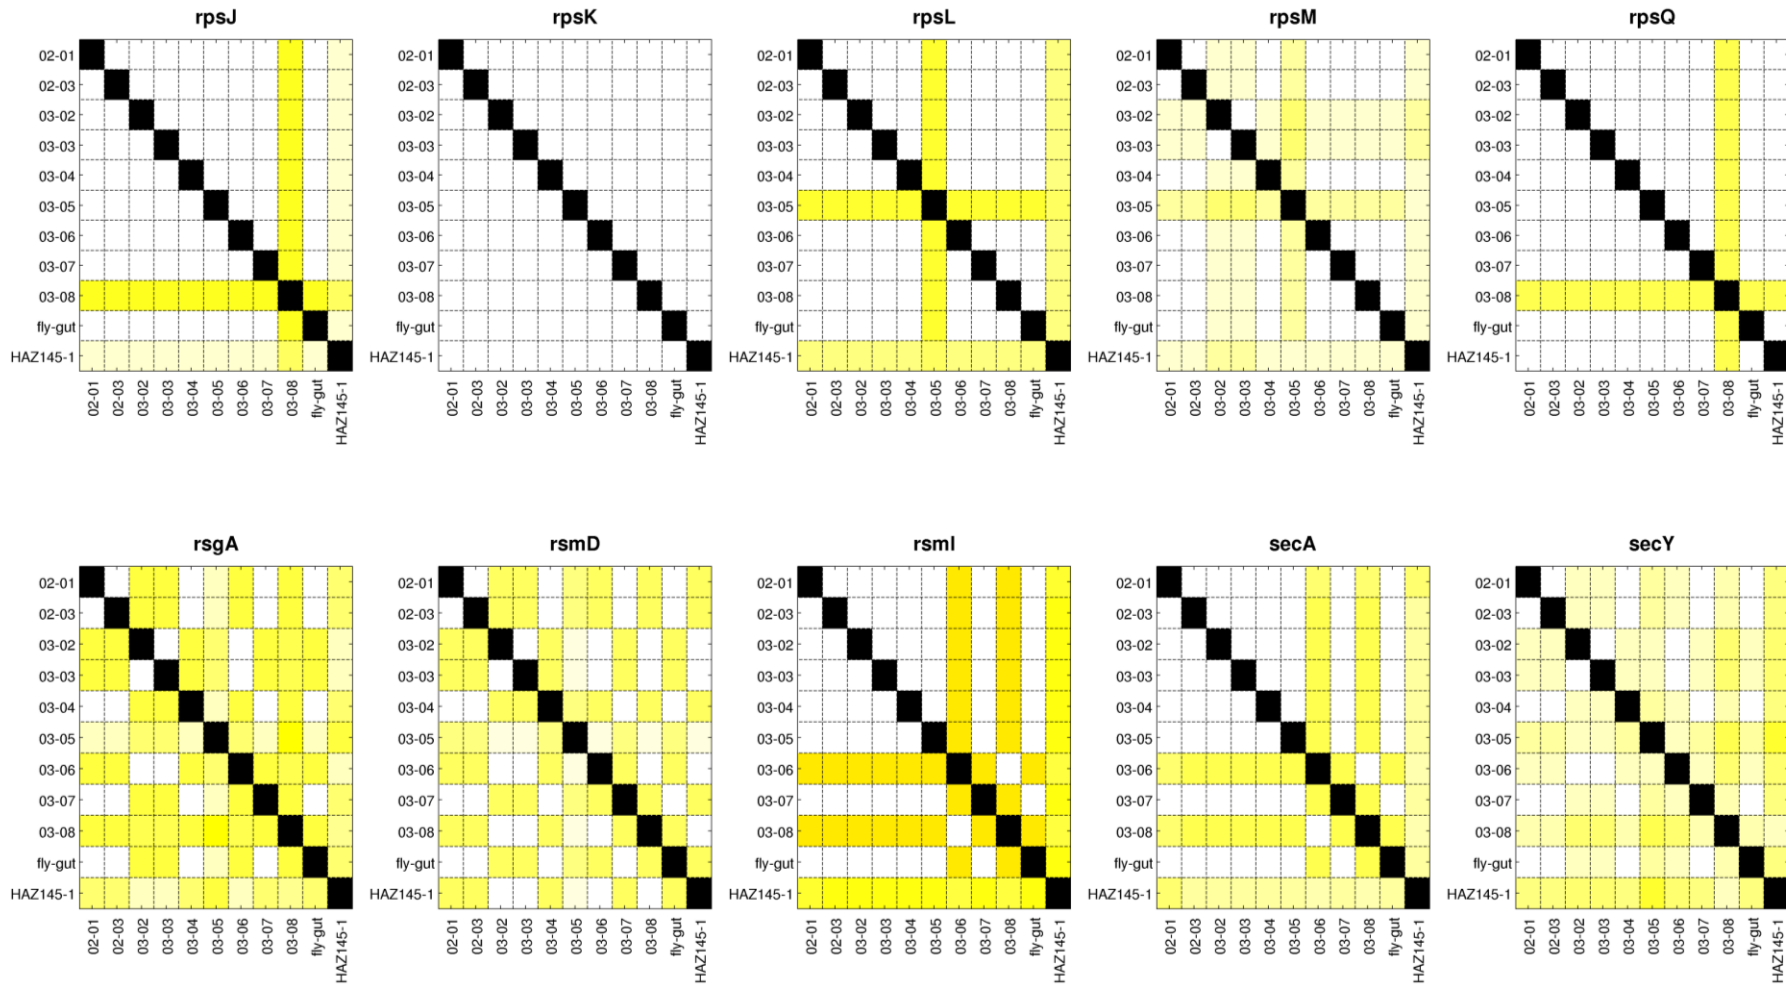

### Supplementary Figure 9

Heatmaps illustrating the percentage of identity (Blastn value) between the 10 newly sequenced *M. arginini* strains and the HAZ145 reference genome. In the figure, genes serS, trmD, truB, tuf, upp, ybeY are represented. A representative set of genes can be found in Figure 4 of the main text

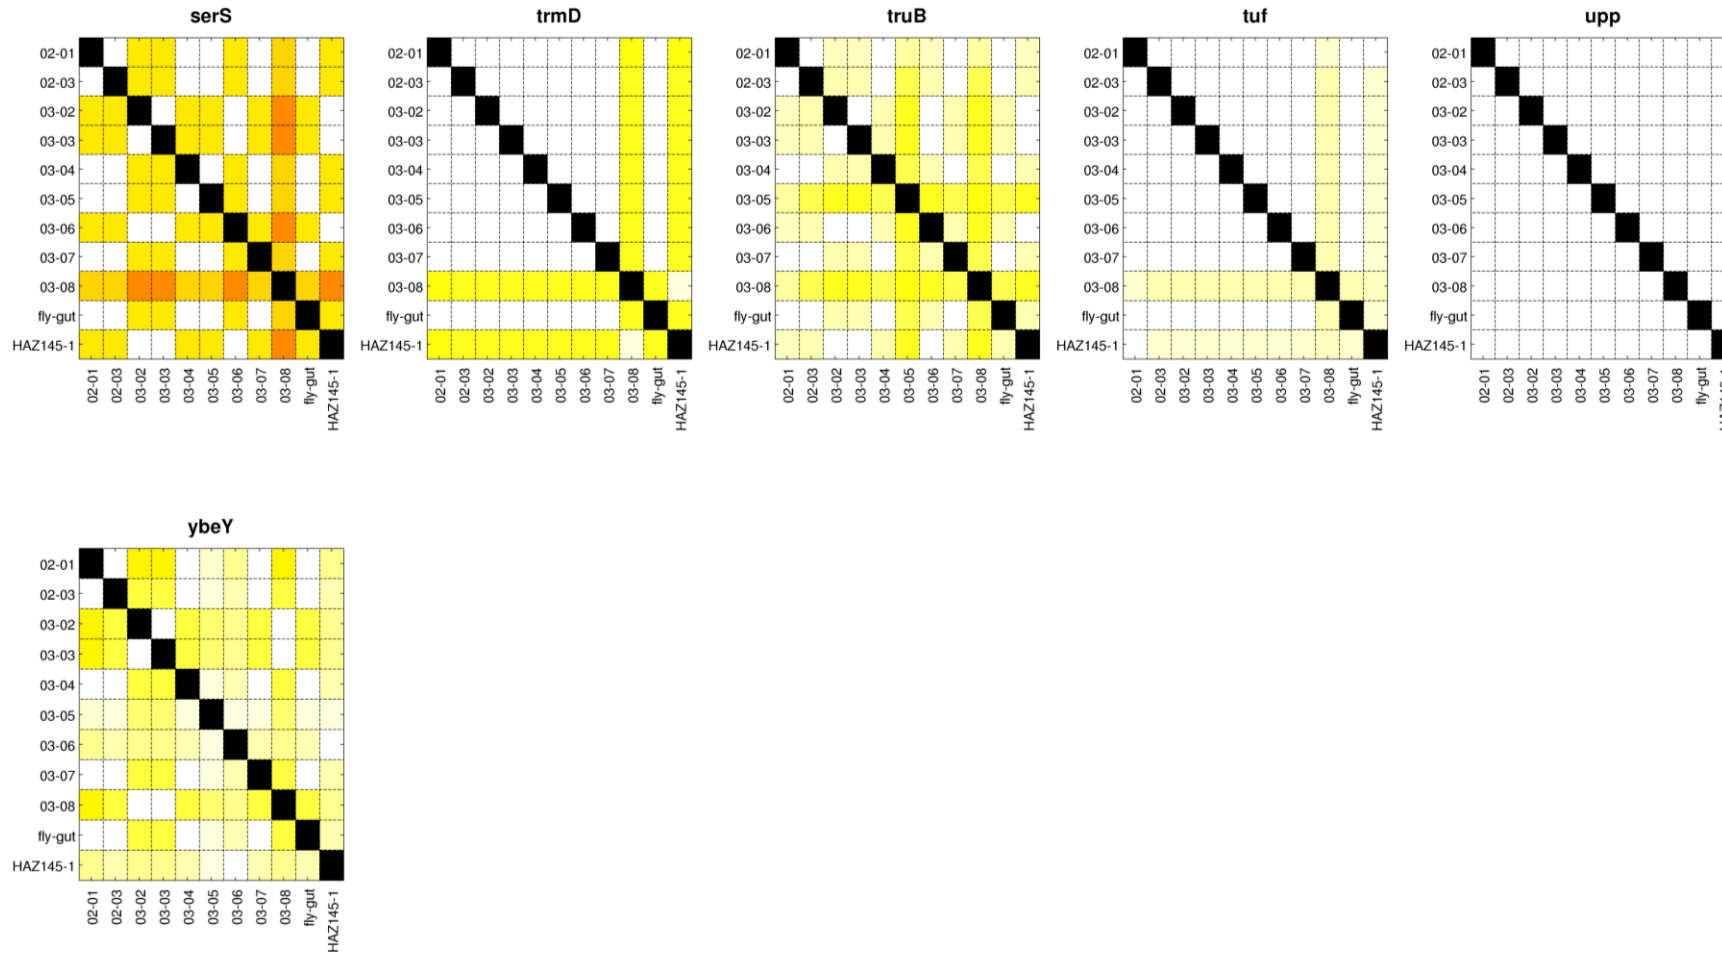

Supplement: spectrum.03010-22-s0001.pdf [file spectrum.03010-22-s0001.pdf]
